# Supplementary material
Source: publisher figshare collection journal article supplement (https://diabetesjournals.figshare.com/ndownloader/files/25480229)
Supplement: Supplementary file 1 [file 25480229]

**Supplement to: Natriuretic effect of 2 weeks of dapagliflozin treatment in patients with type 2 diabetes and preserved kidney function during standardized sodium intake:  
Results of the DAPASALT trial**

Scholtes R.A. et. al.

**Content:**

Supplementary Table 1: Changes in primary and secondary outcomes in the intention to treat population (N=15)

Supplementary Table 2: 24-hour sodium, glucose, urine excretion at each collection day

Supplementary Table 3: Adverse events

Supplementary Figure 1: Study design

Supplementary Table 1: Changes in primary and secondary outcomes in the intention to treat population (N=15)

|                                             |                     | Change from baseline            |                                 | Change from<br>End of Treatment |
|---------------------------------------------|---------------------|---------------------------------|---------------------------------|---------------------------------|
|                                             | Baseline            | Start of Treatment<br>(Day 2-4) | End of Treatment<br>(Day 12-14) | Follow-up<br>(Day 15-17)        |
|                                             | Mean (SD)           | Mean change (95% CI)            | Mean change (95% CI)            | Mean change (95% CI)            |
| 24-hour sodium excretion<br>(mmol/24 hour)  | 147.37<br>(32.17)   | -5.21<br>(-19.54, 9.12)         | 3.69<br>(-24.82, 32.20)         | -16.72<br>(-34.11, 0.66)        |
| 24-hour glucose excretion<br>(mmol/24 hour) | 1.80<br>(2.16)      | 344.85<br>(272.79, 416.91)      | 311.30<br>(224.53, 398.06)      | -203.07<br>(-235.98, -170.16)   |
| 24-hour volume excretion<br>(mL/24 hour)    | 2238.08<br>(594.82) | 57.23<br>(-206.00, 320.47)      | 108.68<br>(-170.27, 387.63)     | -214.33<br>(-437.15, 8.49)      |
| 24-hour systolic blood pressure<br>(mmHg)   | 127.00<br>(10.28)   | -5.27<br>(-8.55, -1.99)         | -7.10<br>(-10.04, -4.16)        | 0.73<br>(-1.99, 3.45)           |
| Body weight (kg)                            | 97.75<br>(15.77)    | -0.73<br>(-1.12, -0.35 )        | -1.68<br>(-2.37, -1.00)         | 0.45<br>(0.02, 0.89)            |
| Plasma volume (L)                           | 3.68 (0.78)         | 0.03<br>(-0.73, 0.79)           | -0.43<br>(-1.08, 0.21)          | 0.48<br>(0.10, 0.85)            |
| Extracellular volume (L)                    | 20.93<br>(4.32)     | -0.67<br>(-1.19, -0.15)         | -0.03<br>(-0.46, 0.40)          | 0.17<br>(-0.14, 0.48)           |
| Intracellular volume (L)                    | 26.41<br>(5.54)     | -0.27<br>(-0.90, 0.35)          | 0.14<br>(-0.52, 0.79)           | -0.33<br>(-0.66, -0.00)         |

Supplementary Table 2: 24-hour sodium, glucose, urine excretion at each collection day

| Period         | Run-in |       |       | Dapagliflozin 10 mg/day treatment |       |       |       |       |       |       | Wash-out |       |       |
|----------------|--------|-------|-------|-----------------------------------|-------|-------|-------|-------|-------|-------|----------|-------|-------|
| Day            | -3     | -2    | -1    | 1                                 | 2     | 3     | 4     | 12    | 13    | 14    | 15       | 16    | 17    |
| Sodium         | 161    | 153   | 129   | 156                               | 156   | 136   | 136   | 153   | 166   | 135   | 137      | 138   | 143   |
| (mmol/24 hour) | (42)   | (33)  | (36)  | (45)                              | (37)  | (42)  | (31)  | (54)  | (79)  | (79)  | (50)     | (38)  | (41)  |
| Glucose        | 2      | 2     | 3     | 258                               | 369   | 338   | 351   | 325   | 321   | 327   | 202      | 94    | 54    |
| (mmol/24 hour) | (2)    | (2)   | (4)   | (57)                              | (134) | (143) | (141) | (148) | (144) | (172) | (135)    | (107) | (79)  |
| Volume         | 2437   | 2269  | 1988  | 2148                              | 2411  | 2401  | 2201  | 2474  | 2487  | 2136  | 2341     | 2137  | 2125  |
| (mL/24-hour)   | (537)  | (666) | (699) | (726)                             | (710) | (874) | (619) | (857) | (868) | (690) | (568)    | (696) | (631) |

Data are provided as mean (SD)

Supplementary Table 3: Adverse events

| Variable                                             | Dapagliflozin (N=17)* |
|------------------------------------------------------|-----------------------|
| Any Adverse Events                                   | 6 (35.3)              |
| Any Serious Adverse Events                           | 0 (0.0)               |
| Any Adverse Event leading to drug discontinuation    | 0 (0.0)               |
| Adverse Events related to dapagliflozin <sup>#</sup> | 4 (23.5)              |
| Adverse Events of interest <sup>†</sup>              |                       |
| Hypoglycemia                                         | 0 (0.0)               |
| Genital infection                                    | 1 (5.9)               |

\*Safety population (N) comprised 17 patients who took at least 1 dapagliflozin tablet.

<sup>#</sup>In the opinion of the Investigator.

Data are expressed as number of patients in each category, n (%). Patients with multiple events in the same category are counted only once in that category.

<sup>†</sup>Based on MedDRA (Medical Dictionary for Regulatory Activities) preferred term.

Supplementary Figure 1: Study design

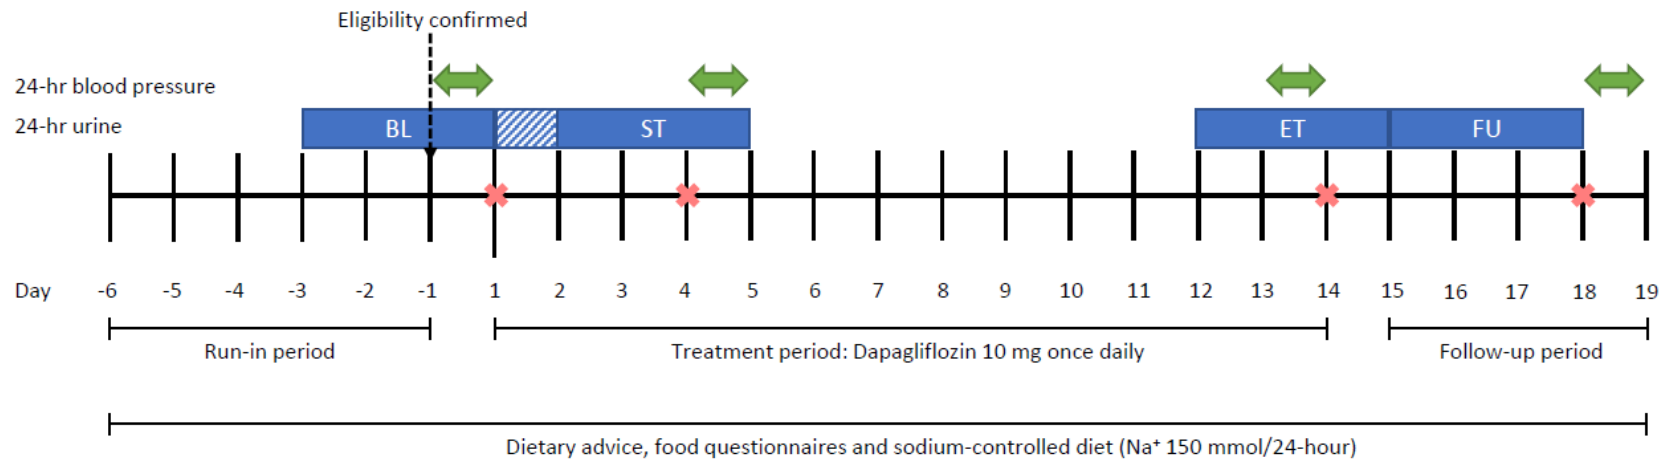

✕ = Blood and urine samples collected, bioimpedance spectroscopy measurements and plasma volume measurements were performed at Day 1, Day 4, Day 14 and Day 18.

↔ = 24-hour blood pressure monitoring was initiated at Day -1, Day 4, Day 13 and Day 18.

■ = 24-hour urine assessment was performed at BL (Days -3 to -1), ST (Days 2 to 4), ET (Days 12 to 14) and FU (Days 15 to 17).

▨ = 24-hour urine collection (not included in assessment).

BL, baseline; ST, start of treatment; ET, end of treatment; FU, follow-up
